# Supplementary material for: A zwitterionic near-infrared fluorophore for real-time ureter identification during laparoscopic abdominopelvic surgery
Source: PubMed Central journal article supplement (PMC6635391; doi:10.1038/s41467-019-11014-1), 2019-07-16

Supplementary Materials of the Manuscript:

***A Zwitterionic Near-Infrared Fluorophore for Real-Time Ureter Identification  
during Laparoscopic Abdominopelvic Surgery***

de Valk et al.

**Supplementary Table 1.** Demographics healthy volunteers and patients per treatment group.

**Healthy volunteers (n=16)**

|                    | <b>0.5 mg ZW800-1<br/>Active drug (n=4) and<br/>Placebo (n=2)</b> | <b>2.5 mg ZW800-1<br/>Active drug (n=4) and<br/>Placebo (n=1)</b> | <b>5.0 mg ZW800-1<br/>Active drug (n=4) and<br/>Placebo (n=1)</b> |
|--------------------|-------------------------------------------------------------------|-------------------------------------------------------------------|-------------------------------------------------------------------|
| <b>Sex</b>         |                                                                   |                                                                   |                                                                   |
| Female (n=8)       | 4                                                                 | 3                                                                 | 1                                                                 |
| Male (n=8)         | 2                                                                 | 2                                                                 | 4                                                                 |
| <b>Age (years)</b> |                                                                   |                                                                   |                                                                   |
| Mean               | 28.8                                                              | 29.6                                                              | 28                                                                |
| Median             | 24                                                                | 21                                                                | 24                                                                |
| Range              | 22–56                                                             | 18–57                                                             | 20–48                                                             |
| <b>Height (cm)</b> |                                                                   |                                                                   |                                                                   |
| Mean               | 173.2                                                             | 172.9                                                             | 177.5                                                             |
| Median             | 172.4                                                             | 169.7                                                             | 178.7                                                             |
| Range              | 164.0–185.8                                                       | 157.0–187.7                                                       | 162.4–187.1                                                       |
| <b>Weight (kg)</b> |                                                                   |                                                                   |                                                                   |
| Mean               | 66.1                                                              | 67.18                                                             | 79.0                                                              |
| Median             | 66.4                                                              | 58.35                                                             | 82.20                                                             |
| Range              | 59.30–77.10                                                       | 52.80–97.15                                                       | 60.75–104.90                                                      |

**Patients (n=12)**

|                           | <b>1.0 mg ZW800-1</b>                                                                                                                                                                                                   | <b>2.5 mg ZW800-1</b>                                                                                                                                                                                                                 | <b>5.0 mg ZW800-1</b>                                                                                                                                                                        |
|---------------------------|-------------------------------------------------------------------------------------------------------------------------------------------------------------------------------------------------------------------------|---------------------------------------------------------------------------------------------------------------------------------------------------------------------------------------------------------------------------------------|----------------------------------------------------------------------------------------------------------------------------------------------------------------------------------------------|
| <b>Sex</b>                |                                                                                                                                                                                                                         |                                                                                                                                                                                                                                       |                                                                                                                                                                                              |
| Female (n=3)              | 3                                                                                                                                                                                                                       | 0                                                                                                                                                                                                                                     | 0                                                                                                                                                                                            |
| Male (n=9)                | 1                                                                                                                                                                                                                       | 4                                                                                                                                                                                                                                     | 4                                                                                                                                                                                            |
| <b>Age (years)</b>        |                                                                                                                                                                                                                         |                                                                                                                                                                                                                                       |                                                                                                                                                                                              |
| Mean                      | 54.5                                                                                                                                                                                                                    | 53.5                                                                                                                                                                                                                                  | 68.3                                                                                                                                                                                         |
| Median                    | 56                                                                                                                                                                                                                      | 57.5                                                                                                                                                                                                                                  | 71                                                                                                                                                                                           |
| Range                     | 34–72                                                                                                                                                                                                                   | 30–69                                                                                                                                                                                                                                 | 58–73                                                                                                                                                                                        |
| <b>Height (cm)</b>        |                                                                                                                                                                                                                         |                                                                                                                                                                                                                                       |                                                                                                                                                                                              |
| Mean                      | 175.5                                                                                                                                                                                                                   | 182.5                                                                                                                                                                                                                                 | 179.0                                                                                                                                                                                        |
| Median                    | 175.0                                                                                                                                                                                                                   | 179.0                                                                                                                                                                                                                                 | 175.5                                                                                                                                                                                        |
| Range                     | 165.0–187.0                                                                                                                                                                                                             | 176.5–192.0                                                                                                                                                                                                                           | 174.0–191.0                                                                                                                                                                                  |
| <b>Weight (kg)</b>        |                                                                                                                                                                                                                         |                                                                                                                                                                                                                                       |                                                                                                                                                                                              |
| Mean                      | 85.0                                                                                                                                                                                                                    | 87.2                                                                                                                                                                                                                                  | 87.6                                                                                                                                                                                         |
| Median                    | 82.0                                                                                                                                                                                                                    | 86.15                                                                                                                                                                                                                                 | 85.0                                                                                                                                                                                         |
| Range                     | 82.0–96.0                                                                                                                                                                                                               | 83.8–92.7                                                                                                                                                                                                                             | 80.0–105.0                                                                                                                                                                                   |
| <b>Surgical procedure</b> |                                                                                                                                                                                                                         |                                                                                                                                                                                                                                       |                                                                                                                                                                                              |
|                           | <ul style="list-style-type: none"> <li>➤ Laparoscopic sigmoid resection</li> <li>➤ Laparoscopic pelvic lymph node dissection</li> <li>➤ Laparoscopic subtotal colectomy</li> <li>➤ Laparoscopic hysterectomy</li> </ul> | <ul style="list-style-type: none"> <li>➤ Laparoscopic sigmoid resection</li> <li>➤ Laparoscopic pelvic lymph node dissection</li> <li>➤ Laparoscopic subtotal colectomy</li> <li>➤ Laparoscopic abdominoperineal resection</li> </ul> | <ul style="list-style-type: none"> <li>➤ Laparoscopic sigmoid resection</li> <li>➤ Laparoscopic pelvic lymph node dissection</li> <li>➤ Laparoscopic low anterior resection (n=2)</li> </ul> |

**Supplementary Table 2. Overview of adverse events.**

| <b>Dose cohort</b>                    | <b>System organ class / preferred term</b>                                                 | <b>Symptom</b>                                 | <b>Severity</b> | <b>Serious adverse event</b> | <b>Relationship to ZW800-1</b> | <b>Occurrence</b> |
|---------------------------------------|--------------------------------------------------------------------------------------------|------------------------------------------------|-----------------|------------------------------|--------------------------------|-------------------|
| <b>Healthy volunteer study (n=16)</b> |                                                                                            |                                                |                 |                              |                                |                   |
| <b>0.5 mg ZW800-1</b>                 |                                                                                            |                                                |                 |                              |                                |                   |
| Patient 1                             | Skin and subcutaneous tissue disorders (preferred term: skin irritation)                   | Skin irritation ECG sticker site               | Mild            | No                           | Unlikely                       | Single occasion   |
| Patient 2 (placebo)                   | Infections and infestations (preferred term: influenza)                                    | Common cold                                    | Mild            | No                           | Unrelated                      | Single occasion   |
| <b>5.0 mg ZW800-1</b>                 |                                                                                            |                                                |                 |                              |                                |                   |
| Patient 3                             | Injury, poisoning and procedural complications (preferred term: procedural complication)   | Subcutaneous infusion (administration site)    | Mild            | No                           | Unrelated                      | Single occasion   |
| Patient 4                             | Nervous system disorders (preferred term: headache)                                        | Headache                                       | Mild            | No                           | Possible                       | Single occasion   |
| Patient 5                             | Psychiatric disorders (preferred term: dyssomnia)                                          | Tired                                          | Mild            | No                           | Possible                       | Single occasion   |
|                                       | Infections and infestations (preferred term: urinary tract infection)                      | Urinary tract infection                        | Mild            | No                           | Possible                       | Single occasion   |
| <b>2.5 mg ZW800-1</b>                 |                                                                                            |                                                |                 |                              |                                |                   |
| Patient 6                             | Metabolism and nutrition disorders (preferred term: increased appetite)                    | Increased appetite                             | Mild            | No                           | Possible                       | Single occasion   |
|                                       | Injury, poisoning and procedural complications (preferred term: infusion site discomfort)  | Painful infusion site (non-administration arm) | Mild            | No                           | Unlikely                       | Single occasion   |
|                                       | Injury, poisoning and procedural complications (preferred term: procedural complication)   | Subcutaneous infusion (administration site)    | Mild            | No                           | Unrelated                      | Single occasion   |
| Patient 7                             | Injury, poisoning and procedural complications (preferred term: application site hematoma) | Hematoma cannula site                          | Mild            | No                           | Unlikely                       | Single occasion   |
| <b>Patient study (n=12)</b>           |                                                                                            |                                                |                 |                              |                                |                   |
| <b>5.0 mg ZW800-1</b>                 |                                                                                            |                                                |                 |                              |                                |                   |
| Patient 1                             | Injury, poisoning and procedural complications (preferred term: procedural pain)           | Dyspnea                                        | Moderate        | No                           | Unrelated                      | Single occasion   |
|                                       | Injury, poisoning and procedural complications (preferred term: procedural pain)           | Chest pain                                     | Mild            | No                           | Unrelated                      | Single occasion   |
| Patient 2                             | Injury, poisoning and procedural complications (preferred term: postoperative ileus)       | Ileus paralytic                                | Moderate        | No                           | Unrelated                      | Single occasion   |
|                                       | Infections and infestations (preferred term: postoperative wound infection)                | Wound infection                                | Mild            | No                           | Unrelated                      | Single occasion   |
| Patient 3                             | Gastrointestinal disorders (preferred term: nausea)                                        | Nausea                                         | Moderate        | No                           | Unrelated                      | Single occasion   |

## Supplementary Figure 1. Pharmacokinetics (blood) healthy volunteers and patients

combined per dose group. Note: One Phase 2 surgical patient in the 2.5 mg dose

(graph B) had a slightly decreased kidney function resulting in the deviation

observed in the curve. All other subjects had normal kidney function (eGFR >90).

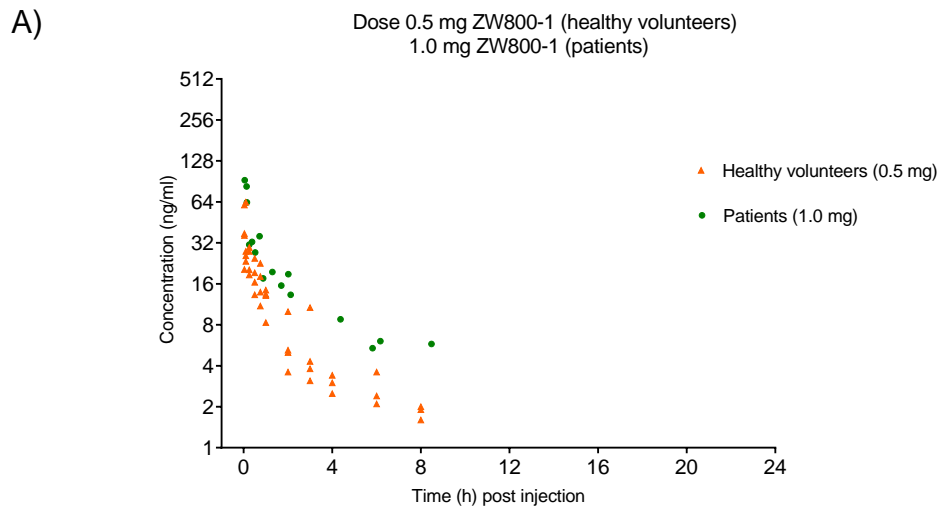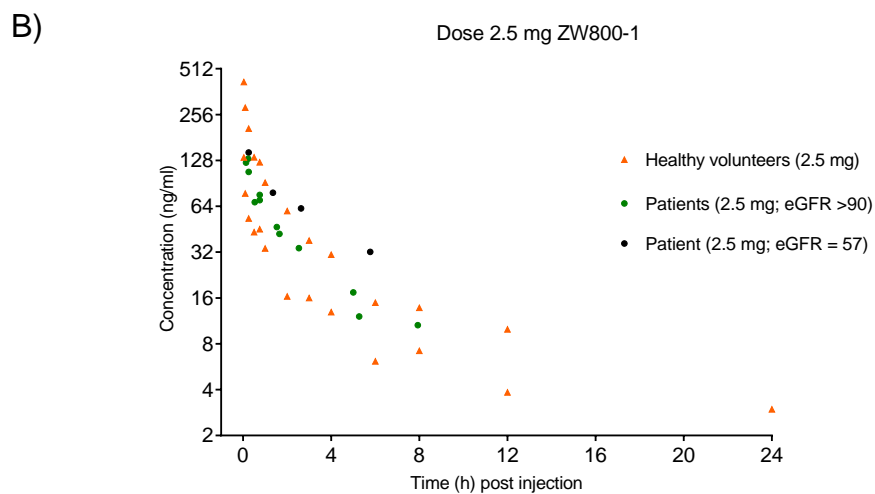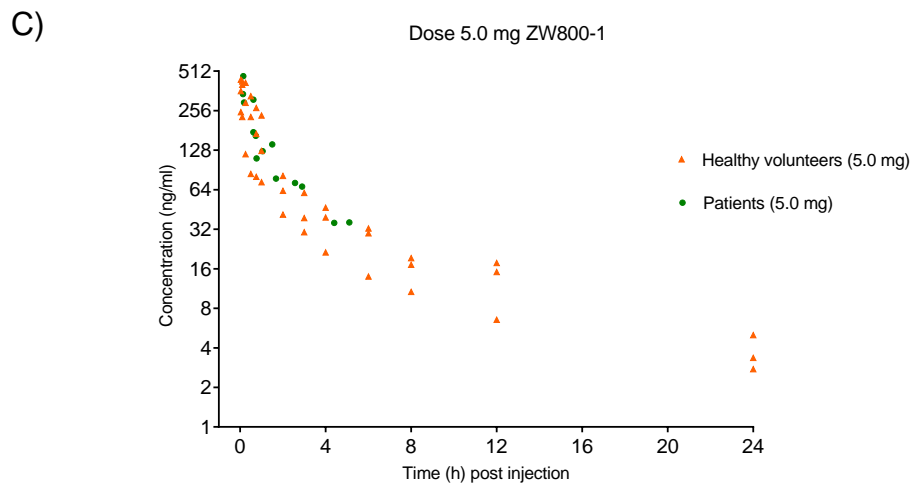

**Supplementary Figure 2.** Fluorescence of the skin in healthy volunteers. Figure A depicts a graph that illustrates the SBR measured over time in the three dosing cohorts, where the baseline measurement of skin was used as ‘background’ in the SBR calculations. The values represent the mean  $\pm$  SD (n= 3 healthy volunteers each group). Figure B shows an example of skin perfusion perceived in a healthy volunteer who received 2.5 mg ZW800-1. Imaging of the skin was performed with the FLARE<sup>®</sup> imaging system.

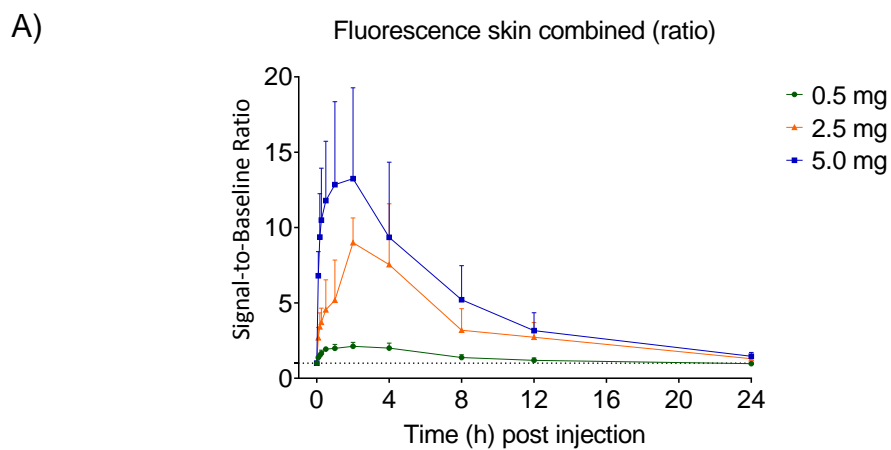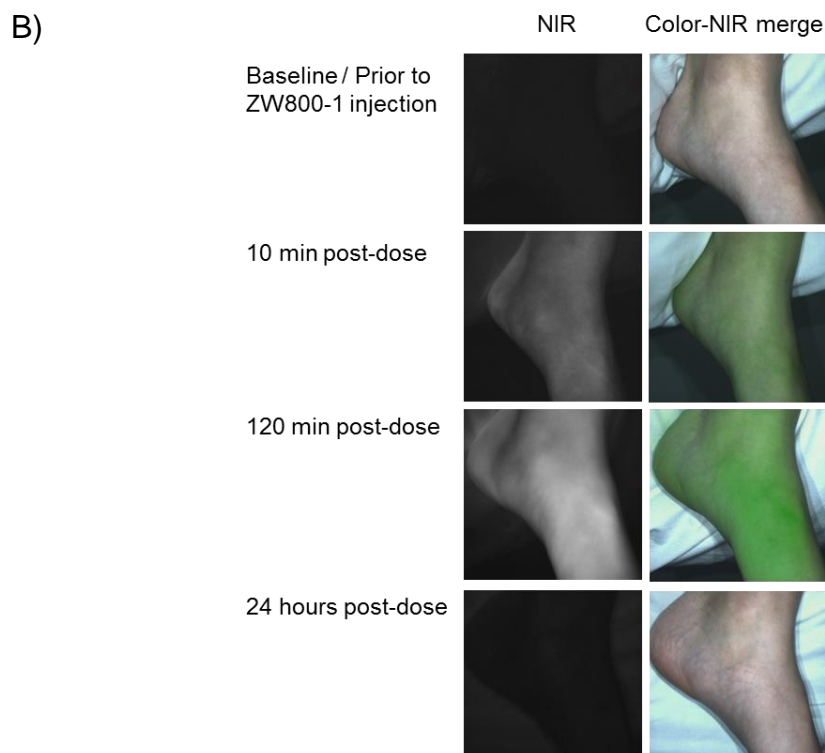

**Supplementary Figure 3.** Cumulative urine excretion ZW800-1 healthy volunteers.

The values represent the mean  $\pm$  SD (n=4 healthy volunteers in 0.5 mg and 3 healthy volunteers in 2.5 mg and 5.0 mg, respectively).

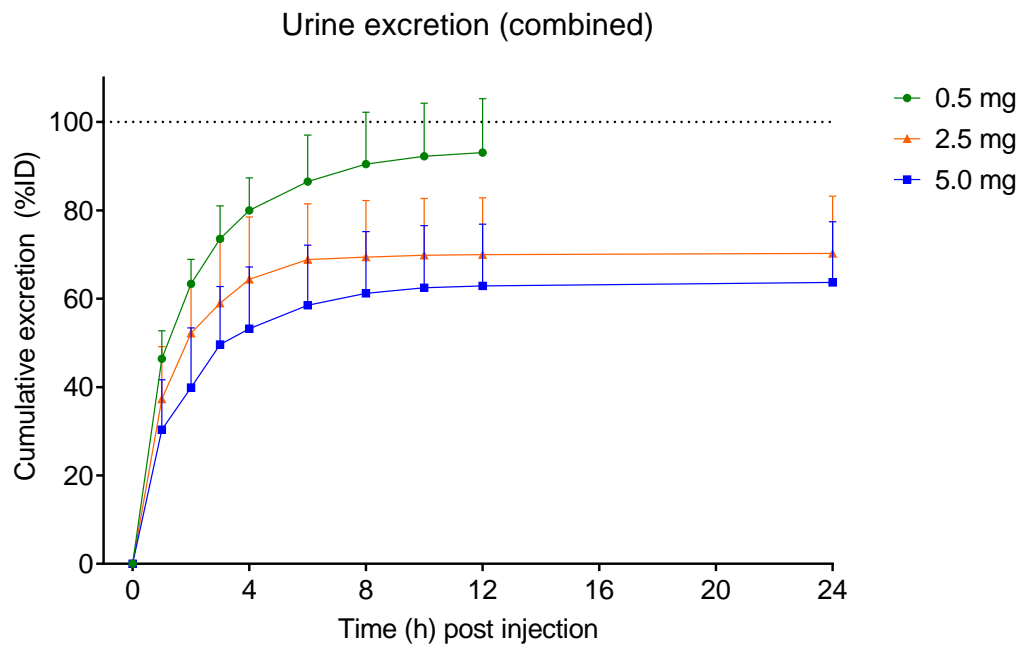

Supplement: 41467_2019_11014_MOESM1_ESM.pdf [file 41467_2019_11014_MOESM1_ESM.pdf]
